# Supplementary material for: Divergent relationship of circulating CTRP3 levels between obesity and gender: a cross-sectional study
Source: PeerJ. 2016 Oct 18;4:e2573. doi: 10.7717/peerj.2573 (PMC5075694; doi:10.7717/peerj.2573)
Supplement: Data S1 — Column A: Subject ID number; Column B: CTRP3 concentration; Column C: subject age; Column D: subject gender; Column E: description for clinical symptom which necessitated the heart catheterization; Column F-M: heart catheterization results; Column N: Was the subject a smoker; Column O: Did the subject have a previous bout of symptoms requiring heart catheterization; Column P: was the subject previously diagnosed with Dyslipidemia; Column Q-T: Values from blood lipid panel (mg/dL); Column U: was the subject previously diagnosed with Hypertension; Column V: blood glucose values (mg/dL); Column W: was the subject previously diagnosed with Type 2 Diabetes Mellitus; Column X: is the subject considered obese?; Column X: subject’s body mass index. [file peerj-04-2573-s001.xlsx]

## Sheet: Sheet1
ID number	CTRP3 (ug/mL)	AGE	Gender	Reason for cath	Significant cad	lm	lad peak	diag	lcx peak	OM_RI	rca peak	PL_LDA	Tobacco	History	Dyslipidemia	TCHOL	HDL	LDL	TRIGLY	Hypertension	Glucose	Diabetes Mellitus	Obesity	bmi
WW36501	0.7135	66	Male	NSTEMI	yes	0	Mild	0	0	50	100	0	Yes	Yes	No	151	42	98	55	Yes	66	No	yes	33.82
WW36502	0.222	58	Female	NSTEMI	yes	0	0	0	95	0	0	0	yes	No	yes	192	42	113	187	yes	45	no	yes	33.89
WW36503	0.56	59	Male	Cardiomyopathy	yes	0	70	0	75 – 80	0	0	0		yes	yes	136	34	37	323	no		yes	yes	33.57
WW36504	0.326	33	Male	NSTEMI	yes	0	100	0	0	0	0	0	yes	yes	no	111	19	68	121	no	30	no	no	21.61
WW36505	0.014	54	female	Abnormal stess	no	0	0	0	0	0	0	0	no	no	yes	215	61	131	115	yes	30	no	yes	31.53
WW36506	0.004	54	Female	Abnormal stess	no	0	0	30	0	0	0	0	no	no	no					no	68	no	no	25.5
WW36507	0.014	50	Female	NSTEMI	yes	0	70	80	70	95	0	75	yes		yes	155	35	90	149	yes	30	yes	yes	43.27
WW36508	0.014	64	female	Unstable Angina	no	0	0	0	0	0	0	0	no	yes	yes	206	34	141	184	yes	45	yes	yes	41.96
WW36509	0.3255	61	Male	chest pain	no	0	20	0	0	0	0	0	no	no	no	142	36	82	121	no	52	no	no	26.99
ww36510	0.1115	56	Female	chest pain	no	0	0	0	0	0	0	0	no	yes	yes	184	33	95	280	yes	240	yes	yes	33.28
ww36511	0.694	60	Male	Abnormal stess	no	0	0	0	0	0	10 – 20	0	no	yes	no					yes	105	no	yes	31.57
ww36512	1.262	47	Female	Abnormal stess	no	0	0	0	0	0	0	0	no	yes	no	108	41	55	61	yes	195	no	yes	32.92
ww36513	0.475	52	male	Abnormal stess	no	0	0	0	0	0	0	0	yes	yes	yes	158	44	70	218	no	140	no	no	22.71
ww36514	0.5585	71	male	Abnormal stess	no	0	0	0	0	0	0	0	no	yes	yes	178	39	101	192	no	57	no	yes	37.9
ww36515	0.3155	72	female	cardiomyopathy	no	0	0	0	0	0	0	0	no	No	no	106	45	51	62	yes	130	no	yes	36.05
ww36516	0.596	51	Male	chest pain	no	0	0	0	0	0	0	0	no	yes	yes	142	27	82	163	yes	61	yes	yes	58.39
ww36517	0.7815	70	female	chest pain	no	0	0	0	0	0	0	0	yes	No	no	119	41	52	130	yes	30	yes	yes	42.84
ww36518	0.0765	56	female	chest pain	no	0	0	0	0	0	0	0	no	yes	yes	229	33	135	366	yes	248	yes	yes	33.95
ww36519	0.6685	71	female	Abnormal stess	no	0	0	20	20	0	0	0	no	yes	yes	142	43	65	172	yes	91	no	no	25.06
ww36520	0.4645	71	female	chest pain	no	0	0	0	0	0	0	0	yes	No	yes	155	48	94	79	no	105	no	yes	36.31
ww36521	0.421	58	male	Abnormal stess	yes	0	40	30	0	95	0	0	yes	yes	yes	198	36	116	278	yes	30	no	no	27.34
ww36522	0.382	55	male	chest pain	no	0	0	0	0	0	0	0	yes	yes	yes	106	36	15	274	no	30	no	no	22.32
ww36523	0.014	64	Female	Abnormal stess	no	0	0	0	0	0	0	0	no	No	no	154	49	92	63	yes	112	no	yes	30.62
ww36524	0.077	49	Female	severe MR	no	0	0	0	0	0	0	0	yes	No	no					no		no	no	24.59
ww36525	0.4945	83	male	Abnormal stess	no	0	0	0	0	0	0	0	no	No	no	194	42	112	199	no	100	no	no	21.3
ww36526	0.4245	80	male	NSTEMI	no	Mild	50	60	40	60	60	0	yes	No	no	153	50	82	103	yes	129	yes	no	21.34
ww36527	0.014	70	male	chest pain	no	0	0	0	0	0	0	0	yes	No	no	127	48	72	45	yes	54	no	yes	30.68
ww36528	0.4905	57	male	chest pain	no	0	60	0	30	20	30	0	yes	yes	no					yes	88	no	yes	40.45
ww36529	0.5415	67	female	Abnormal stess	no	0	20	60	40	0	30	20	no	yes	yes	267	55	183	146	yes	138	yes	no	26.21
ww36530	0.5225	66	female	chest pain	yes	0	0	0	0	0	100	0	no	No	yes					yes	72	no	yes	35.44
ww36531	0.2345	55	male	Abnormal stess	no	0	40	40	40	30	0		yes	No	yes	258	27	194	187	yes	134	no	no	24.67
ww36532	0.014	32	male	Abnormal stess	no	0	0	0	0	0	0	0	yes	yes	no	162	45	104	79	no	42	no	yes	32.49
ww36533	0.326	63	male	Abnormal stess	no	0	0	0	0	0	0	0	no	No	yes	210	37	148	124	yes	96	no	no	28.35
ww36534	0.822	69	female	chest pain	no	0	0	0	0	0	0	0	no	yes	yes	212	40	154	89	yes	54	no	no	25.63
ww36535	0.574	58	male	Abnormal stess	no	0	0	0	0	0	0	0	no	No	yes	62	26	22	71	yes	97	yes	yes	37.94
ww36536	1.161	40	male	chest pain	no	0	0	0	0	0	0	0	yes	yes	no	128	32	84	74	yes	140	no	no	25.11
ww36537	1.1605	52	male	stemi	yes	0	0	0	0	0	100		yes	No	yes	185	39	118	234	yes	77	no	yes	39.06
ww36538	0.9875	57	female	chest pain	no	0	0	0	0	0	0	0	no	No	yes	206	55	126	152	no	113	no	yes	38.74
ww36539	0.911	51	female	stemi	yes	0	100	0	0	80	0	0	yes	yes	yes	201	31	131	197	no	188	no	no	29.26
ww36540	0.6865	64	female	Abnormal stess	yes	0	30	70	0	70	0	0	No	Yes	No	161	52	101	50	No	52	No	No	24.33
ww36541	0.2745	38	Female	abnormal stress	no	0	0	0	0	0	0	0	Yes	No	No					Yes	84	Yes	Yes	51.36
ww36542	0.6035	62	male	Chest pain	no	0	0	0	0	0	0	0	Yes	No	No					No	80	No	Yes	34.92
ww36543	0.9405	59	Female	Abnormal stress	no	0	0	0	0	0	0	0	No	No	Yes	197	40	141	79	Yes	67	No	Yes	30.73
ww36544	0.7445	52	Female	Chest pain	no	0	0	0	0	0	0	0	No	Yes	yes	223	70	115	188	No	67	No	Yes	35.15
ww36545	0.96	53	Female	Chest pain	no	0	0	0	0	50	0	0	No	No	Yes	245	39	182	121	Yes	33	No	Yes	36.02
ww36546	0.5725	70	Female	NSTEMI	no	0	0	0	0	0	0	0	Yes	No	Yes	213	52	139	111	Yes	68	No	No	20.6
ww36547	1.0275	56	Female	Abnormal stress	no	0	50	0	0	30	0	0	No	Unknown	yes	141	34	71	176	Yes	30	Yes	Yes	39.99
ww36548	1.4045	66	Female	Chest pain	no	0	0	0	0	0	0	0	Yes	Yes	Yes	172	31	n	535	Yes	82	No	No	24.56
ww36549	0.3505	48	Male	Chest pain	no	0	0	0	0	0	0	0	Yes	Unknown	Yes	201	42	143	80	Yes	75	No	No	28.08
ww36550	0.656	61	Female	Chest pain	no	0	0	0	0	0	0	0	No	No	No	153	56	70	138	Yes	228	Yes	Yes	37.73
ww36551	0.681	58	Male	Abnormal stress	no	0	50	0	0	0	0	0	No	No	Yes					No	67	No	No	29.29
ww36552	0.259	68	Male	Abnormal stress	no	0	0	0	0	80	30	0	Yes	No	Yes	143	47	68	138	No	90	No	No	27.1
ww36553	1.147	50	male	NSTEMI	yes	0	75	50	30	0	0	0	Yes	Yes	Yes	138	31	88	95	No	85	No	Yes	44.33
ww36554	0.304	46	male	Abnormal stress	no	0	0	0	0	0	0	0	No	No	Yes	169	36	90	213	Yes	116	Yes	No	28.75
ww36555	0.416	72	Female	Cardiomyopathy	no	0	0	0	0	0	0	0	Yes	No	Yes	232	50	156	130	Yes	65	No	Yes	30.85
ww36556	0.49	56	Male	Abnormal stress	yes	20	75	30	90	90	90	0	Yes	No	Yes	189	43	118	144	No	81	No	Yes	33.03
ww36557	0.5395	53	Female	Abnormal stress	no	30	30	40	30	30	60	0	Yes	No	Yes	188	38	129	107	Yes	83	yes	No	22.13
ww36558	0.5845	64	Male	Abnormal stress	no	0	0	0	0	0	0	0	Yes	No	No	128	50	68	51	No	105	No	No	28.29
ww36559	0.6285	61	Female	Abnormal stress	no	0	40	0	0	30	75	0	No	Yes	Yes	245	36	182	136	Yes	108	No	Yes	29.77
ww36560	1.4065	55	Male	STEMI	yes	0	80	0	40	50	100	80	No	Yes	Yes	134	30	80	122	Yes	73	No	Yes	32.31
ww36561	1.174	48	Male	Shortness of breath	no	0	0	0	0	0	0	0	Yes	Yes	Yes	147	27	82	190	Yes	20	Yes	Yes	31.46
ww36562	0.9645	47	Female	NSTEMI	yes	0	0	0	0	0	90	0	No	Unknown	Yes	300	28	236	180	Yes		No	No	25.92
ww36563	1.6745	47	Female	NSTEMI	no																103		No	26.96
ww36564	0.077	73	Male	Abnormal stress	yes	0	100	0	40	50	85	60	Yes	Yes	Yes	119	33	73	65	Yes	20	No	No	28.35
ww36565	0.6765	47	Male	Chest pain	no	0	0	0	0	0	0	0	Yes	Yes	Yes					Yes	136	Yes	No	25.8
ww36566	0.8055	41	Male	STEMI	yes	0	0	0	0	50	100		Yes	Yes	Yes	128	26	29	366	No	65	No	No	29.25
ww36567	1.049	58	Male	NSTEMI	yes	0	75	0	0	30	95	0	No	Yes	Yes	156	32	101	117	Yes	105	No	Yes	31.75
ww36568	1.1245	47	Male	Abnormal stress	no	0	20	0	0	0	0	0	Yes	No	Yes					Yes	28	No	Yes	37.24
ww36569	0.9685	62	Female	Abnormal stress	no	0	0	0	0	0	0		No	No	Yes	115	29	64	111	Yes	44	Yes	Yes	40.28
ww36570	0.077	52	male	NSTEMI	yes	0	100	90	100	0	0	100	Yes	Yes	Yes	238	38	156	220	Yes	146	Yes	Yes	38.59
ww36571	0.9245	57	Female	Chest pain	yes	0	85	0	0	0	20	0	Yes	No	Yes	164	50	62	259	Yes	257	Yes	Yes	45.35
ww36572	0.969	66	female	Abnormal stress	no	0	40	0	0	0	0	0	Yes	No	Yes	144	60	60	120	Yes	143	No	Yes	32.42
ww36573	0.7235	87	male	NSTEMI	no	0	40	0	0	0	0	0	Yes	No	Yes	101	26	36	193	Yes	228	Yes	No	29.17
ww36574	1.0045	57	female	Abnormal stress	no	0	0	0	0	0	0	0	Yes	No	Yes	220	48	126	232	Yes	80	No	Yes	47.4
ww36575	1.0275	76	Female	Chest pain	no	0	0	0	0	0	0	0	Yes	No	No					No	160	No	No	26.91
ww36576	1.245	39	Female	Abnormal stress	no	0	0	0	0	0	0	0	No	Yes	Yes	152	30	79	215	Yes	69	No	Yes	47.43
ww36577	1.2865	56	Male	Abnormal stress	no	0	Mild	0	Mild	0	Moderate	0	Yes	No	yes	183	46	12	64	Yes	41	No	Yes	36.26
ww36578	1.238	31	Male	Abnormal stress	no	0	0	0	0	0	0	0	No	Unknown	Yes	130	33	84	67	No	30	No	Yes	47.38
ww36579	0.9735	32	Female	Chest pain	no	0	0	0	0	0	0	0	Yes	No	Yes	194	32	113	246	No	47	No	Yes	49.02
ww36580	0.9855	73	Female	Abnormal stress	no	0	40	0	20	0	0	0	Yes	Yes	No	149	47	86	81	Yes	53	No	Yes	42.38
ww36581	1.0425	56	Male	Abnormal stress	no	0	0	0	0	0	0	0	No	No	Yes					Yes	53	No	No	25.4
ww36582	1.126	75	Female	Chest pain	no	0	0	0	0	40	0	0	No	Yes	Yes					Yes	61	No	No	24.22
ww36583	1.414	56	Female	Chest pain	yes	0	0	70	30	50	90	0	Yes	Yes	yes	160	37	100	115	No	43	No	No	22.93
ww36584	1.213	20	Female	Chest pain	no	0	0	0	0	0	0	0	Yes	Yes	No					Yes	72	No	Yes	40.92
ww36585	1.4055	56	male	Chest pain	yes	99	80	30	95	70	60	0	Yes	No	No	185	43	114	141	Yes	82	Yes	No	23.18
ww36586	0.7565	70	Male	NSTEMI	yes	0	70	50	0	90	0	0	Yes	Yes	Yes	184	24	114	231	Yes	99	Yes	Yes	33.66
ww36587	0.851	66	male	Chest pain	no	0	0	0	0	0	0	0	Yes	No	Yes	100	24	50	131	Yes	102	Yes	Yes	49.17
ww36588	0.883	50	Male	Abnormal stress	no	0	0	0	0	0	0	0	No	No	Yes	184	51	105	140	No	65	No	Yes	28.12
ww36589	0.2055	53	Male	Abnormal stress	no	0	0	0	0	0	0	0	No	No	Yes					Yes	23	No	No	26.72
ww36590	0.0925	60	Female	Abnormal stress	no	0	0	0	0	0	0	0	Yes	Yes	No	192	42	128	131	No	83	No	Yes	46.86
ww36591	0.014	66	Female	Abnormal stress	yes	0	70	0	0	0	80	80	Yes	No	Yes	181	42	93	229	Yes	93	Yes	Yes	42.29
ww36592	0.519	48	Male	Abnormal stress	no	0	0	50	0	0	0	0	Yes	No	Yes					No	112	No	No	25.83
ww36593	0.7475	77	Male	NSTEMI	yes	50	90	85	80	85	95	Mild	No	Yes	Yes	162	33	86	221	Yes	189	Yes	No	32.19
ww36594	0.2215	69	Male	Abnormal stress	yes	0	85	95	Moderate	60	100		No	Yes	Yes	208	38	136	171	Yes	65	No	Yes	34.87
ww36595	0.262	54	Female	abnormal stress	no	0	60	0	0	0	0	0	no	no	yes	209	45	136	167	yes	191	yes	yes	44.64
ww36596	0.262	64	male	ua	yes	0	95	n	0	mod	10 to 30	0	no	no	yes	172	34		416	no	83	no	yes	37.59
ww36597	0.194	10	male	abnormal stress	yes	0	60	75	mild	0	95		yes	no	no					yes	108	no	no	24.55
ww36598	0.154	56	Male	abnormal stress	no	0	50	0	0	0	0		yes	no	yes	139	24	72	215	yes	169	yes	yes	30.27
ww36599	0.89	38	male	UA	yes	0	60	95	40	0	30	40	no	yes	yes	211	35	126	251	yes	33	yes	no	29.3
ww36600	0.13	66	Female	abnormal stress	yes	0	70	0	40	40	0	0	no	yes	yes	173	40	102	127	no	37	yes	yes	36.1
